# Supplementary material for: White spot syndrome virus entry is dependent on multiple endocytic routes and strongly facilitated by Cq-GABARAP in a CME-dependent manner
Source: PubMed Central journal article supplement (PMC4935888; doi:10.1038/srep28694), 2016-07-07
Supplement: srep28694-s1.pdf [file srep28694-s1.pdf]

1064 **White spot syndrome virus entry is dependent on multiple endocytic routes and**  
1065 **strongly facilitated by Cq-GABARAP in a CME-dependent manner**

1066

1067 Rong-yuan Chen<sup>1</sup>, Kai-li Shen<sup>1</sup>, Zhen Chen<sup>1</sup>, Wei-wei Fan<sup>1,3</sup>, Xiao-lu Xie<sup>1</sup>, Chuang  
1068 Meng<sup>1</sup>, Xue-jiao Chang<sup>1</sup>, Li-bing Zheng<sup>1</sup>, Joseph Jeswin<sup>1</sup>, Cheng-hua Li<sup>3</sup>, Ke-jian

1069 Wang<sup>1,2</sup> and Hai-peng Liu<sup>1,2\*</sup>

1070

1071 <sup>1</sup>State Key Laboratory of Marine Environmental Science, Xiamen University, Xiamen  
1072 361102, Fujian, PR China; <sup>2</sup>Fujian Collaborative Innovation Center for Exploitation  
1073 and Utilization of Marine Biological Resources, State-Province Joint Engineering  
1074 Laboratory of Marine Bioproducts and Technology , Xiamen 361102, Fujian, PR  
1075 China; <sup>3</sup>Faculty of Life Science and Biotechnology, Ningbo University, 818 Fenghua  
1076 Road, Ningbo 315211, Zhejiang, PR China<sup>c</sup>.

1077

1078 \*Address correspondence to Hai-peng Liu, [Haipengliu@xmu.edu.cn](mailto:Haipengliu@xmu.edu.cn). Tel.: +86 592  
1079 2183203; Fax: +86 592 2183203.

1080

1081 **Running title: WSSV entry mechanism**

1082

1083 **Supplementary Figures 1 to 3, Table 1, and Methods**

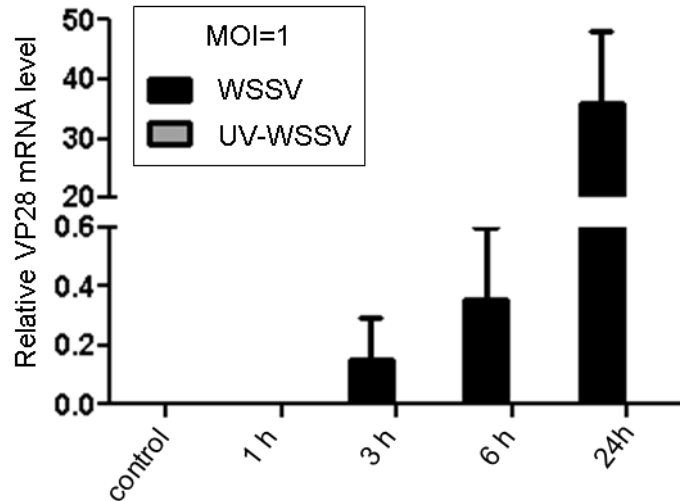

1084

1085 **Supplementary Figure 1. Examination of the expression of the WSSV envelope**  
 1086 **protein VP28 during viral infection in Hpt cells by qRT-PCR.** The Hpt cells were  
 1087 incubated with indicated virus inoculation, namely WSSV or UV-inactivated WSSV  
 1088 (UV-WSSV), or uninfected as control. After indicated time points (1, 3, 6 and 24 hpi),  
 1089 the cells were harvested for qRT-PCR, showing that no VP28 transcription was  
 1090 detected in Hpt cells uninfected or infected with UV-WSSV, while increased amount  
 1091 of VP28 translation since 3 hpi in the cells infected with WSSV.

1092

1093

1094

1095

1096

1097

1098

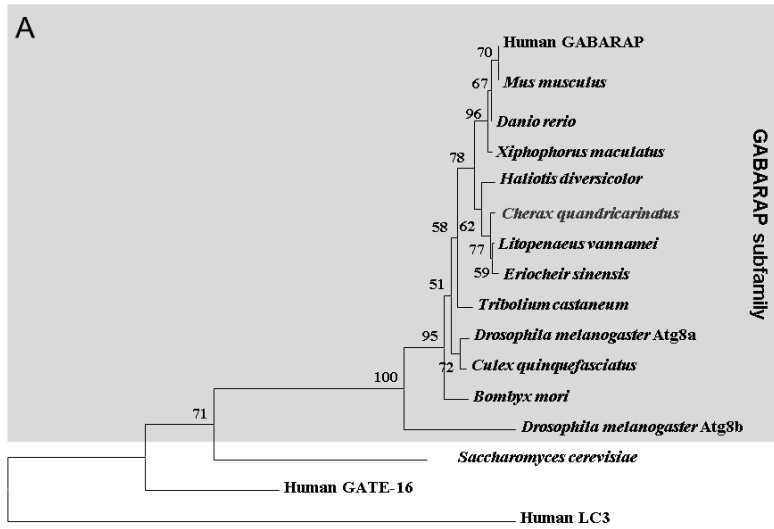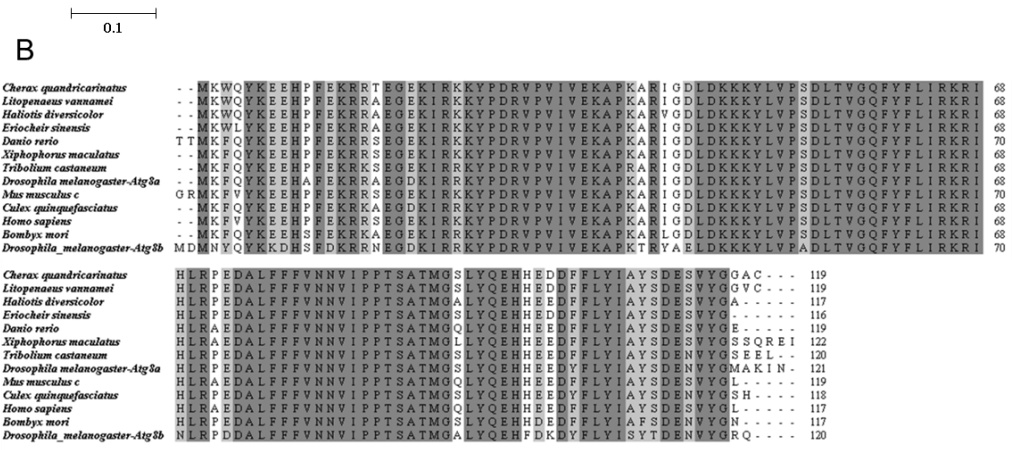

1099

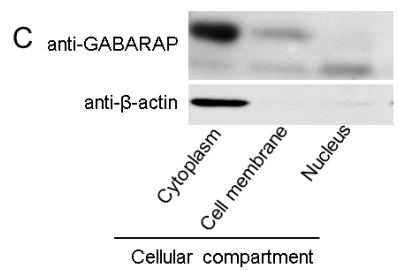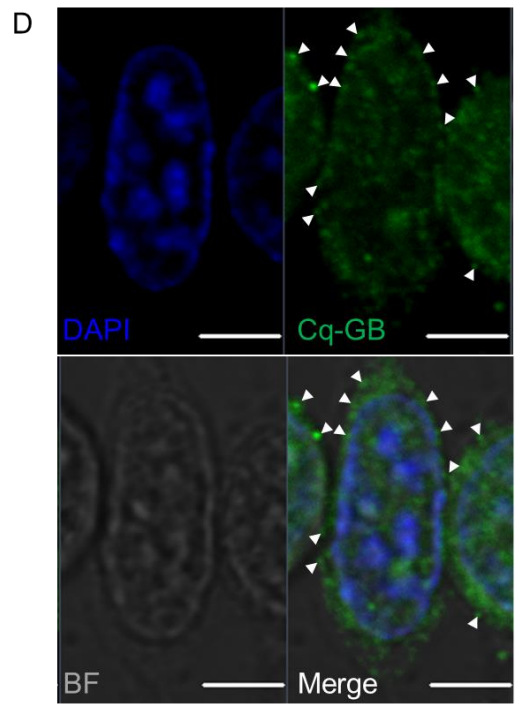

1100

1101 **Supplementary Figure 2. Characterization of Cq-GABARAP. A: Phylogenetic**

1102 tree of Atg8 family proteins. B: Multiple sequence alignment of GABARAP from  
1103 different species. The identical amino acid residues are dark gray, and similar amino  
1104 acids are shown with a light gray background (*Litopenaeus vannamei*, AFV99179.1;  
1105 *Haliotis diversicolor*, ADI56518.1; *Eriocheir sinensis*, AEE60804.1; *Danio rerio*,  
1106 XP\_003199067.2; *Xiphophorus maculatus*, XP\_005804839.1; *Tribolium castaneum*,  
1107 XP\_973073.1; *Culex quinquefasciatus*, XP\_001844428.1; *Drosophila*  
1108 *melanogaster*-Atg8a, NP\_727447.1; *D. melanogaster*-Atg8b, AAF55459.1; *Bombyx*  
1109 *mori*, NP\_001040244.1; *Mus musculus*, EDL12513.1; *Homo sapiens*, NP\_009209.1;  
1110 Human GATE-16, P60520; Human LC3, Q9H492; Human GABARAP,  
1111 NP\_009209.1). C: The distribution of Cq-GABARAP protein in different cellular  
1112 compartments examined by immunoblotting.  $\beta$ -actin was used as a marker protein for  
1113 the cytoplasmic compartment. D: Distribution of Cq-GABARAP in Hpt cells  
1114 determined by IFA. Hpt cells were harvested for IFA analysis with anti-GABARAP  
1115 antibody. The nucleus was stained with DAPI and cell images were taken under  
1116 confocal microscopy. White arrowheads indicate some of the events that  
1117 Cq-GABARAP located on cell membranes. Bars indicate 10  $\mu$ m.  
1118

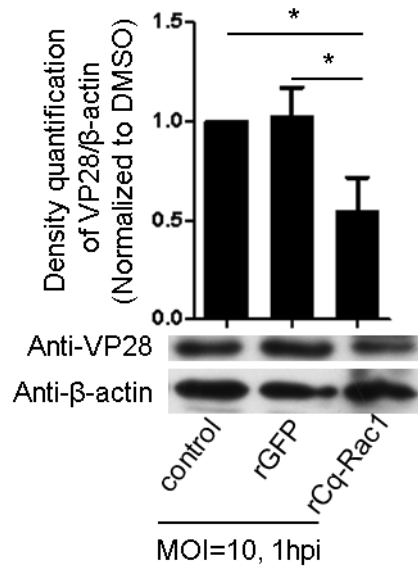

1119

1120 **Supplementary Figure 3. Suppression of WSSV entry by recombinant Cq-Rac1**

1121 **(rCq-Rac1).** Hpt cell cultures were transfected with rCq-Rac1 (1 μg), rGFP or no

1122 protein as a control for 40 min using PULSin and then subjected to viral infection

1123 before viral entry examination by immunoblotting (lower panel). The band intensities

1124 of three independent experiments were analyzed using the QuantityOne program

1125 (upper panel). The data are presented as the mean ± SEM from at least three

1126 independent experiments and were analyzed by Student's *t* test (\**P*<0.05).

1127

1128

1129

1130

1131

1132

1133

**Supplementary Table 1. Primers used in the present study**

| Primers                       | Sequence information (5'-3')                |
|-------------------------------|---------------------------------------------|
| <b>Gene clone</b>             |                                             |
| 5'CLC 612-                    | CTTGATGGGAGGATTCTGCTTCA                     |
| 3'CLC 210+                    | TTGAGATGCTGGGTGGAGATGA                      |
| Degenerate AP50+              | TAYAAAYCAYAARGGIGARGT                       |
| Degenerate AP50-              | CCRAAYTTRCAYTCIGGCAT                        |
| 5 AP50 357-                   | TGTGTCTGTGTTCTGAGGATACCCA                   |
| 3 AP50 332+                   | TTGGGTATCCTCAGAACACAGACAC                   |
| 5'GB 199-                     | ATGGTAGCGGAGGTTGGAGGAATGA                   |
| 3'GB +                        | GTAGCGGAGGTTGGAGGGATGAC                     |
| Rac1+                         | CGAGGATGGAGGATTGTTGAG                       |
| Rac1-                         | TCGCTTGACTGGGAATCTGAG                       |
| 5DYN 338-                     | TTCTGACCCGTAATGCGATCTGTG                    |
| 3DYN 2085+                    | GCTCCTTGCCACCTGTATGCC                       |
| <b>qRT-PCR</b>                |                                             |
| IE1-F                         | CTGGCACAACAACAGACCCTACC                     |
| IE1-R                         | GGCTAGCGAAGTAAAATATCCCCC                    |
| VP28-F                        | AAACCTCCGCATTCTGT                           |
| VP28-R                        | GTGCCAACTTCATCCTCATC                        |
| 16s-F                         | AATGCTTCTTGCACCACCAAC                       |
| 16s-R                         | AGGTCTTGCTCAGCTGGATACC                      |
| Dete-CLC+                     | TGCTGAGGAGGTAAGCAAGATAG                     |
| Dete-CLC-                     | GCATTTAAGCCTTGATGGGAG                       |
| Dete-AP50 499+                | AAGACAGCAAGCAAGGAGGAG                       |
| Dete-AP50 889-                | CTGGAGGAACAAATGAAATAGAGTG                   |
| Dete-GB155+                   | CGTGCCGGTAATTGTAGAGAAGG                     |
| Dete-GB594-                   | AAACTGCACCAAGACACCCTG                       |
| dete Dyn 1853+                | CATTCCTACGTGCTGGTGTTT                       |
| dete Dyn 2160-                | TCGTTTACGTGCCTCCTCTGG                       |
| <b>RNAi</b>                   |                                             |
| Ri-CLC+                       | TAATACGACTCACTATAGGGCGACCATCACACACCATCTACAC |
| Ri-CLC-                       | TAATACGACTCACTATAGGGTCTGTGCCTGGTTCCATCTTC   |
| RiAP50 226+                   | TAATACGACTCACTATAGGGACGAACATTGCACGCACCA     |
| RiAP50 669-                   | TAATACGACTCACTATAGGGCGCCACATGGGCAGACAA      |
| Ri-GB 188+                    | TAATACGACTCACTATAGGGTCGCATTGGTGACTTGGATAAG  |
| Ri-GB 639-                    | TAATACGACTCACTATAGGGGCAATTCTTTAGCACCTCAGGG  |
| Ri Dyn 2055+                  | TAATACGACTCACTATAGGGCACGTCTATGGACCCTCAACT   |
| Ri Dyn 2592-                  | TAATACGACTCACTATAGGGAAGAATCCCTGAATTACCCTGT  |
| <b>Recombinant expression</b> |                                             |
| eGB 1+                        | CGGGATCCATGAAGTGGCAGTACAAGG                 |
| eGB 396-                      | AAGCGGCCGCTCAGCACGCCCTCCATA                 |
| eRac1 1+                      | GGAATTCCATATGATGTCATCTGGCCGTCCCAT           |
| eRac1 588                     | CCGGAATTCTTAGAGGACTGAGCACTTGCGC             |

## 1136 **Supplementary Methods**

1137 **Hpt cell cultures.** The hematopoietic tissue from the dorsal side of the crayfish  
1138 stomach was dissected, briefly washed with CPBS (crayfish phosphate buffer saline:  
1139 10 mM Na<sub>2</sub>HPO<sub>4</sub>, 10 mM KH<sub>2</sub>PO<sub>4</sub>, 150 mM NaCl, 10 mM CaCl<sub>2</sub>, 10 mM MnCl<sub>2</sub> and  
1140 27 mM KCl, pH 6.8) and incubated in 500 µl of collagenase (0.1% collagenase type I  
1141 and IV in CPBS) for 45 min at room temperature to dissociate the Hpt cells. The  
1142 separated cells were washed twice with CPBS and then centrifuged for 3 min at 1,500  
1143 g and room temperature. The cell pellet was resuspended in modified L15 medium  
1144 (Sigma-Aldrich) containing 5 µM 2-mercaptoethanol (Sigma-Aldrich), 1 µM  
1145 phenylthiourea (Sigma-Aldrich), 60 µg/ml penicillin (Gibco), 50 µg/ml streptomycin  
1146 (Gibco), 50 µg/ml gentamicin (Gibco) and 2 mM L-glutamine (Thermo Fisher) and  
1147 then subsequently seeded at a density of 2×10<sup>5</sup> cells per 0.5 ml in 24-well plates. The  
1148 prepared Hpt cells were allowed to attach for 30 min at room temperature, and 2 µl of  
1149 a plasma preparation containing crude astakine was then added to each well as  
1150 described by Söderhäll et al.<sup>1</sup>. One-third of the medium was replaced with fresh  
1151 medium every second day.

1152 **Total RNA isolation and qRT-PCR:** The Hpt cells were harvested for total RNA  
1153 isolation using the GenElute™ Mammalian Total RNA Miniprep Kit (Sigma) at 6 hpi.  
1154 After DNase I (Ambion) digestion, 1 µg of the purified total RNA was used for cDNA  
1155 synthesis with the Prime Script™ RT Reagent kit (TaKaRa). qRT-PCR was performed,  
1156 and the transcripts for IE1 (GenBank accession no. NC\_003225.2) and VP28

1157 (GenBank accession no. AF227911.1) were employed to assess the replication of  
1158 WSSV in Hpt cell cultures. The crayfish 16S ribosomal RNA gene (GenBank  
1159 accession no. AF135975.1)<sup>2</sup>, a mitochondrial ribosomal RNA gene<sup>3,4</sup>, was utilized as  
1160 an internal control.

1161 **Immunoblotting analysis:** The protein samples were separated by 13.5%  
1162 SDS-PAGE and wet-transferred to a PVDF membrane. The membrane was blocked in  
1163 5% non-fat milk in TBST for 2 h, briefly washed with TBST, incubated with a 1:3000  
1164 dilution of the anti-VP28 primary antibody, and washed three times with TBST for 8  
1165 min/wash. The membrane was then incubated with an HRP-conjugated  
1166 goat-anti-mouse IgG antibody at a dilution of 1:10,000 in TBST for 1 h, washed five  
1167 times with TBST (8 min/wash) and detected using the ECL reagent (Minipore). The  
1168 immunoblotting signal of protein bands was quantified with QuantityOne software  
1169 (Bio-Rad).

1170 **Gene cloning: Cq-GABARAP, Cq-CLC, Cq-AP50, Cq-dynamin and**  
1171 **Cq-RAC1.** We previously isolated partial sequences of the Cq-GABARAP and  
1172 Cq-CLC genes, which are transcriptionally up-regulated in Hpt cells following WSSV  
1173 challenge<sup>5</sup>. Full-length cDNAs encoding the open reading frames of these genes were  
1174 obtained by RACE-PCR. To clone other evolutionally conserved molecules involved  
1175 in the CME process, such as Cq-AP50, Cq-dynamin and Cq-Rac1, degenerate PCR  
1176 followed by RACE-PCR was performed to obtain the full-length cDNAs for these  
1177 genes. All of the primers used for PCR are shown in Supplementary Table 1. The



1178 BLAST (<http://blast.ncbi.nlm.nih.gov/Blast.cgi>) program was used to analyze the  
1179 sequences, and Bioedit 7.0.9.0 and Mega 5.0 were used to conduct the multiple  
1180 sequence alignments and phylogenetic analysis, respectively.

1181 **Preparation of the recombinant proteins.** The open reading frame of  
1182 Cq-GABARAP or Cq-CLC was cloned into the pGEX-4T-2 bacterial expression  
1183 vector (GE Healthcare). The open reading frame of Cq-Rac1 or GFP was cloned into  
1184 the pET28a bacterial expression vector (GE Healthcare) using primers as listed in  
1185 Supplementary Table 1. The correct orientation and sequence of the cloned genes  
1186 were confirmed by sequencing. The resulting plasmids were then introduced into *E.*  
1187 *coli* (BL21), and IPTG was used to induce the ectopic expression of the inserted genes.  
1188 The recombinant GST-fusion proteins were purified using an ÄKTA system with a  
1189 GSTrap FF column (GE Healthcare) followed by dialysis against phosphate buffered  
1190 saline (PBS, pH 7.4) to remove the excess GSH. The concentration of the resulting  
1191 proteins was then determined, and the proteins were mixed with an equal volume of  
1192 glycerol and stored at -80 °C for later use.

1193 **Biotinylation of WSSV:** To isolate the putative viral binding proteins from the  
1194 Hpt cells, the WSSV envelope proteins were biotinylated by incubating the freshly  
1195 prepared viral envelope proteins with NHS-D-biotin (Sigma) at room temperature for  
1196 4 h. Ammonium chloride (NH<sub>4</sub>Cl) was then added to the reaction solution to stop the  
1197 labeling reaction, and the mixture was then dialyzed three times with PBS buffer (12

1198 h/time) at 4 °C to remove the excess biotin. The obtained biotinylated viral envelope  
1199 proteins were used for the pull-down assays.

1200

## 1201 **References**

1202 1 Söderhäll, I., Kim, Y. A., Jiravanichpaisal, P., Lee, S. Y. & Söderhäll,  
1203 K. An ancient role for a prokineticin domain in invertebrate hematopoiesis. *J*  
1204 *Immunol* **174**, 6153-6160, (2005).

1205 2 Crandall, K. A., Harris, D. J. & Fetzner, J. W., Jr. The monophyletic  
1206 origin of freshwater crayfish estimated from nuclear and mitochondrial DNA  
1207 sequences. *Proc Biol Sci* **267**, 1679-1686, (2000).

1208 3 Yang, L. *et al.* Species identification through mitochondrial rRNA  
1209 genetic analysis. *Sci Rep* **4**, 4089, (2014).

1210 4 Kearsley, S. E. & Craig, I. W. Altered ribosomal RNA genes in  
1211 mitochondria from mammalian cells with chloramphenicol resistance. *Nature*  
1212 **290**, 607-608, (1981).

1213 5 Liu, H.-P., Chen, R.-Y., Zhang, Q.-X., Peng, H. & Wang, K.-J.  
1214 Differential gene expression profile from haematopoietic tissue stem cells of  
1215 red claw crayfish, *Cherax quadricarinatus*, in response to WSSV infection.  
1216 *Dev Comp Immunol* **35**, 716-724, (2011).

1217
